# Are cell wall traits a component of the succulent syndrome?

Fradera-Soler, Marc<sup>a,b,\*</sup>; Leverett, Alistair<sup>b,c,\*</sup>; Mravec, Jozef<sup>a</sup>; Jørgensen, Bodil<sup>a</sup>; Borland, Anne M.<sup>c</sup>; Grace, Olwen M.<sup>b</sup>

\*Marc Fradera-Soler and Alistair Leverett should be considered joint first authors.

<sup>a</sup> Department of Plant and Environmental Sciences, University of Copenhagen, Thorvaldsensvej 40, 1871, Frederiksberg, Denmark

<sup>b</sup> Royal Botanic Gardens, Kew, Richmond, Surrey TW9 3AB, United Kingdom

<sup>c</sup> School of Natural and Environmental Sciences, Newcastle University, Newcastle Upon Tyne NE1 7RU, United Kingdom

## Abstract

Succulence is an adaptation to low water availability characterised by the presence of water-storage tissues that alleviate water stress under low water availability. The succulent syndrome has evolved convergently in over 80 plant families and is associated with anatomical, physiological and biochemical traits. Despite the alleged importance of cell wall traits in drought responses, their significance in the succulent syndrome has long been overlooked. Here, by analysing published pressure–volume curves, we show that elastic adjustment, whereby plants change cell wall elasticity, is uniquely beneficial to succulents for avoiding turgor loss. In addition, we used comprehensive microarray polymer profiling (CoMPP) to assess the biochemical composition of cell walls in leaves. Across phylogenetically diverse species, we uncover several differences in cell wall biochemistry between succulent and non-succulent leaves, pointing to the existence of a ‘succulent glycome’. We also highlight the glycomic diversity among succulent plants, with some glycomic features being restricted to certain succulent lineages. In conclusion, we suggest that cell wall biomechanics and biochemistry should be considered among the characteristic traits that make up the succulent syndrome.

**Keywords:** succulence, plant diversity, cell walls, cell wall elasticity, CoMPP, glycomics, turgor

## Abbreviations and symbols

### Physiological parameters

|               |                                                                 |
|---------------|-----------------------------------------------------------------|
| $\varepsilon$ | Bulk modulus of cell wall elasticity                            |
| $P$           | Turgor pressure                                                 |
| RWC           | Relative water content                                          |
| $TLP_{\Psi}$  | Turgor loss point, i.e. water potential at which turgor is lost |
| $\Psi$        | Water potential                                                 |
| $\pi_0$       | Osmotic potential of tissue at full hydration                   |

### Cell wall polymers

|      |                                 |
|------|---------------------------------|
| AGP  | Arabinogalactan protein         |
| HG   | Homogalacturonan                |
| RG-I | Rhamnogalacturonan I            |
| DM   | Degree of methyl-esterification |
| DP   | Degree of polymerization        |

## 1 Introduction

2 Climate change-induced aridity is expected to increase across much of the globe in the future  
3 (Sheffield and Wood, 2008; Jiao et al., 2021). Consequently, it has become imperative that we understand  
4 the ways in which plants cope with drought (Choat et al., 2018; Trueba et al., 2019). Recently, plant  
5 scientists have begun to pay renewed attention to the drought adaptations found in succulent plants  
6 (Heyduk et al., 2016; Males, 2017; Fradera-Soler et al., 2021; Leverett et al., 2021). Succulence is defined  
7 by the presence of water stores, in the leaf, stem and/or roots, which can be mobilized when a plant is  
8 dehydrated (Ogburn and Edwards, 2010). Typically, succulent tissues (i.e. the tissues responsible for  
9 water storage) arise due to the development of enlarged cells, either in the photosynthetic tissue  
10 (chlorenchyma), in a specialized achlorophyllous water-storage tissue (hydrenchyma), or a combination  
11 of the two (Eggli and Nyffeler, 2009; Borland et al., 2018; Heyduk, 2021; Leverett et al., 2022). If water  
12 stored in large cells can be mobilized during drought, succulent plants can dehydrate whilst maintaining  
13 water potentials ( $\Psi$ ) at safe, stable levels. By buffering plant  $\Psi$ , succulence prevents a number of  
14 detrimental processes from occurring, such as the closing of stomata, the buckling of cells and the  
15 formation of emboli in the xylem (Brodribb et al., 2016; Vollenweider et al., 2016; Zhang et al., 2016;  
16 Henry et al., 2019). The benefits conferred by succulence have resulted in the succulent syndrome being  
17 found in plants across the globe, following adaptive radiations into the world's arid and semi-arid  
18 ecosystems (Arakaki et al., 2011).

19 The adaptive benefits of succulence have recently drawn the attention of synthetic biologists, who  
20 have begun to recognize the potential this adaptation could have for food security and bioenergy in a  
21 drying world (Borland et al., 2009; Grace, 2019). Both modelling and field trials have assessed the value  
22 of growing succulent *Agave* and *Opuntia* in dry marginal and underused lands (Owen and Griffiths, 2014;  
23 Davis et al., 2017; Hartzell et al., 2021; Neupane et al., 2021). Furthermore, progress has been made to  
24 synthetically produce succulence in non-succulent species. The introduction of an exogenous transcription  
25 factor gene into *Arabidopsis thaliana* led to increased tissue succulence and higher water-use efficiency  
26 (Lim et al., 2018, 2020). These findings strongly suggest that bioengineering succulence has the potential  
27 to enhance drought resistance in crops. Whilst some work has been done to understand the genetic  
28 programs controlling the development of succulence (Heyduk, 2021), a great deal more research is  
29 needed if we are to fully utilize this adaptation in agricultural settings. In addition, we must appreciate  
30 every important trait that makes up the succulent syndrome. Beyond the genetic control of cell size,  
31 succulent species often exhibit a number of other co-adaptive traits, such as 3D vascular patterning,  
32 crassulacean acid metabolism (CAM) and waxy cuticles (Griffiths and Males, 2017). Cell walls have  
33 recently been postulated as an often-overlooked key component of the succulent syndrome (Ahl et al.,

34 2019; Fradera-Soler et al., 2022), yet the precise mechanistic relevance of cell walls in succulent tissues  
35 remains largely speculative. In the present study, we analyse diverse succulent species and propose that  
36 cell wall biomechanics and biochemistry should be considered among the characteristic components of  
37 the succulent syndrome.

38

## 39 **Cell wall biomechanics in succulents**

40 All plant cells are encased in a lattice-like structure, the cell wall (Popper et al., 2011). Primary,  
41 extensible cell walls are complex and dynamic systems composed largely of polysaccharides, polyphenols  
42 and certain types of glycoproteins (Carpita et al., 2015). When plant cells are hydrated, an osmotic  
43 gradient exists across the plasma membrane which results in water moving into the protoplasm (Beadle et  
44 al., 1993). This intake of water causes the plasma membrane to push against the cell wall, generating a  
45 positive pressure called turgor ( $P$ ). The bulk modulus of cell wall elasticity ( $\epsilon$ ) relates to  $P$  according to  
46 the equation:

47

$$\epsilon = \frac{\delta P}{\delta RWC} \quad (1)$$

48

49 where relative water content (RWC) is the percentage of total water present in a tissue. Higher values of  $\epsilon$   
50 indicate greater cell wall rigidity and thus more resistance for the plasma membrane to push against, with  
51 changes in RWC resulting in large changes in  $P$ . Conversely, when  $\epsilon$  is low and cell walls are highly  
52 elastic, changes to RWC have a lower impact on  $P$ , because cell walls can stretch and provide less  
53 resistance.

54 For succulent plants,  $\epsilon$  has the potential to affect the point at which turgor is lost. As plant tissues  
55 dehydrate,  $\Psi$  falls, which results in a linear drop in  $P$  (Beadle et al., 1993). Eventually,  $\Psi$  falls to a point  
56 where  $P = 0$ , meaning there has been a total loss of turgor. When this turgor loss point ( $TLP_{\Psi}$ ) has been  
57 reached, leaves will typically wilt and cells will begin to experience damage (Trueba et al., 2019).  
58 Consequently, it is beneficial for plants to avoid reaching their  $TLP_{\Psi}$  (Kunert et al., 2021). Bartlett et al.  
59 (2012) found that the  $TLP_{\Psi}$  can be estimated by:

60

$$TLP_{\Psi} = \frac{\pi_O \times \varepsilon}{\pi_O + \varepsilon} \quad (2)$$

61

62 where  $\pi_O$  is the osmotic potential of fully hydrated tissues (a more negative  $\pi_O$  corresponds to a higher  
63 concentration of osmotically active solutes). Modifying  $\varepsilon$  or  $\pi_O$  are named elastic and osmotic adjustment,  
64 respectively, and can be used to alter the  $TLP_{\Psi}$  in order to allow cells to maintain turgor at more negative  
65 water potentials. Lower  $\varepsilon$  could result in cell walls capable of changing shape and folding as the  
66 protoplasm within shrinks (Ahl et al., 2019; Fradera-Soler et al., 2022). This would prevent the  
67 catastrophic disruption of the membrane-wall continuum and other forms of irreversible damage due to  
68 mechanical stress which occur when the  $TLP_{\Psi}$  is reached. However, studies of non-succulent species have  
69 found that  $\varepsilon$  is generally so high that changes to this trait are inconsequential for the  $TLP_{\Psi}$  (Bartlett et al.,  
70 2012). Put differently, in non-succulent species, cell walls are quite rigid, which means that even  
71 substantial changes to their elastic properties will not affect their  $TLP_{\Psi}$ . This can be visualized by  
72 considering **Fig. 1A**. If  $\pi_O$  is held constant and  $\varepsilon$  is allowed to vary, the  $TLP_{\Psi}$  can be simulated using **Eq.**  
73 **2**. This simulation forms a curve, and in non-succulent tissues the true value of  $\varepsilon$  intersects at the flat  
74 portion of the curve. Consequently, the phenotypic space inhabited by non-succulent species is one where  
75 changes to  $\varepsilon$  have no effect on the  $TLP_{\Psi}$ .

76 The primary cell walls in succulent tissues are generally very thin and elastic (Goldstein et al.,  
77 1991; Ogburn and Edwards, 2010). Thus, the true value of  $\varepsilon$  for succulent species more often falls on the  
78 curved portion of the line (**Fig. 1B**). This means that for many succulent tissues, changes to cell wall  
79 biomechanics through elastic adjustment would have a much more substantial effect on the  $TLP_{\Psi}$  than in  
80 non-succulent plants. We sought to quantify this effect of  $\varepsilon$  on  $TLP_{\Psi}$  by repeating the simulation in **Figs.**  
81 **1A-B** for several species. Ogburn and Edwards (2012) studied the relationship between parameters  
82 derived from pressure–volume curves and measures of succulence in the Caryophyllales, an angiosperm  
83 order comprising many succulent-rich groups with a broad range of tissue succulence. Using their  
84 published data,  $\pi_O$  was held constant for each species and  $\varepsilon$  was allowed to vary in order to simulate the  
85  $TLP_{\Psi}$  according to **Eq. 2**. Then, for each species, we found the derivative of the curve, at the true value of  
86  $\varepsilon$  (i.e. where the dashed line intersects the curve). This derivative,  $f'(\varepsilon)$ , is a quantitative estimate of the  
87 extent to which changing  $\varepsilon$  affects the  $TLP_{\Psi}$ . As  $\varepsilon$  values become very low in highly succulent species,  
88  $f'(\varepsilon)$  becomes exponentially higher (**Fig. 1C**). Finally, we explored the relationship between  $f'(\varepsilon)$  and  
89 saturated water content (SWC), as the latter has been shown to be a powerful metric to quantify  
90 succulence in the Caryophyllales (Ogburn and Edwards, 2012). Log-transformed estimates of  $f'(\varepsilon)$   
91 correlated significantly with SWC, using a linear regression model (**Fig. 1D**).

92 Together, our data show that unlike non-succulent species, succulent plants occupy a phenotypic  
93 space in which increases in cell wall elasticity during drought (i.e. elastic adjustment) can result in  
94 substantial decreases in  $TLP_{\psi}$ . Furthermore, once a succulent species moves into this phenotypic space,  
95 decreasing  $\epsilon$  has an exponential effect on  $f'(\epsilon)$ , so that alterations to cell wall biomechanics become an  
96 increasingly efficient means of controlling the  $TLP_{\psi}$ . This agrees with the recently observed drought-  
97 induced modifications of pectic polysaccharides in hydrenchyma cell walls of *Aloe* (Ahl et al., 2019),  
98 which are believed to be a form of elastic adjustment that allows them to fold as cells shrink during  
99 dehydration (**Fig. 3**).

100

## 101 **Cell wall biochemistry in succulents**

102 One way to assess the biochemical composition of cell walls is to investigate the extracellular  
103 glycome, which encompasses the entirety of extracellular carbohydrates in a tissue, organ or plant, and  
104 the majority of which corresponds to the cell wall. Characterizing glycomic profiles across different plant  
105 species can indicate which cell wall components have been favoured under different environmental  
106 conditions. Whilst the glycomes of some economically important succulent taxa, such as *Agave*, *Aloe* and  
107 *Opuntia*, have recently been analysed (Ginestra et al., 2009; Li et al., 2014; Ahl et al., 2018; Jones et al.,  
108 2020), little has been done to compare the cell wall composition of other distantly related succulent  
109 species. Hence, we sought to test the hypothesis that the extracellular glycome of phylogenetically diverse  
110 succulent species will exhibit some differences from those of non-succulents, so that a common  
111 ‘succulent glycome’ emerges. To this end, we sampled leaf material from 10 species with succulent  
112 leaves and 10 with non-succulent leaves, representing diverse lineages within the angiosperms (**Table 1**).  
113 Using the succulence index (SI) from Ogburn and Edwards (2010) as a proxy for the degree of succulence  
114 (see **Supplementary material**), these two groups differed significantly ( $P < 0.01$ ) (**Fig. 2**). We used  
115 comprehensive microarray polymer profiling (CoMPP) to estimate and compare the relative  
116 polysaccharide contents of leaves from these species (see **Supplementary material**) (Moller et al., 2007;  
117 Ahl et al., 2018). We used whole leaves for comparability across species, assuming that mesophyll tissues  
118 would dominate the results. In the current study we used three extraction steps: water (targeting soluble  
119 unbound or loosely bound polysaccharides), CDTA (targeting primarily pectins) and NaOH (targeting  
120 primarily hemicelluloses). CoMPP relies on antibody-based molecular probes, so we used 49 monoclonal  
121 antibodies (mAbs) to target the majority of known cell wall polymer motifs (Moller et al., 2007; Rydahl  
122 et al., 2018) (**Tables S1–S3**). No representatives of commelinid monocots were included, given that their

123 type-II cell wall biochemistry is particularly distinct from that of the rest of angiosperms (Carpita et al.,  
124 2015).

125 CoMPP results were analysed using multiple factor analysis (MFA) (see **Supplementary**  
126 **material**), which indicated that succulent species occupy a distinct phenotypic space different from non-  
127 succulent species (**Fig. 2A**). Of particular note is MFA dimension 3, along which succulents and non-  
128 succulents differed significantly ( $P < 0.01$ ) and was driven mostly by glycoprotein- and pectin-targeting  
129 mAbs (**Fig. S1**). Three succulent species were “pulling” along dimension 1 and fell far from the main  
130 cluster, but even when omitting these three outliers from the MFA, the results still showed a significant  
131 difference between succulents and non-succulents (**Fig. S2**). We observed a higher signal for  
132 homogalacturonans (HGs) with a high degree of methyl-esterification (DM) in succulents (**Fig. S4**),  
133 which influences the nature of pectin gels (Willats et al., 2001; Hocq et al., 2017; Wormit and Usadel,  
134 2018) and increases cell wall elasticity (Peaucelle et al., 2011; Levesque-Tremblay et al., 2015; Bidhendi  
135 and Geitmann, 2016). In contrast, non-succulents had a higher signal for low-DM HGs, which may  
136 indicate stiffer cell walls. Furthermore, we observed a higher signal for rhamnogalacturonan I (RG-I)  
137 backbones in succulents compared to non-succulents (**Fig. S5**). RG-I and its side chains (i.e. arabinans,  
138 galactans and/or arabinogalactans) have been postulated as cell wall plasticizers, which is a crucial feature  
139 for cells undergoing structural wall changes during dehydration and rehydration (Harholt et al., 2010;  
140 Moore et al., 2013; Kaczmarska et al., 2022). Together, MFA of the CoMPP results suggests that  
141 fundamental differences exist between the cell wall composition of diverse succulent and non-succulent  
142 species (**Fig. 2B**). The three outlying succulent species (*Anacampseros namaquensis*, *Lithops*  
143 *karasmontana* and *Portulacaria afra*) belong to the core Caryophyllales, and two of them (*A.*  
144 *namaquensis* and *P. afra*) to suborder Portulacineae. These taxa showed remarkably high signal for RG-I  
145 as well as soluble glucuronoxylans (**Figs. S5, S6**), which most likely reflects the presence of highly  
146 hydrophilic apoplastic mucilage in succulents in the Caryophyllales, particularly those in the  
147 Portulacineae (**Fig. 3**) (Hernandes-Lopes et al., 2016; Cole, 2020).

148 In addition to MFA, we used a random forest (RF) algorithm to determine whether extracellular  
149 glycomic profiles can be used to predict if a species is succulent or non-succulent (see **Supplementary**  
150 **material**). Based on CoMPP data alone, the RF algorithm was able to classify species in their respective  
151 categories with 90% accuracy. The variable importance plot from the RF algorithm identified several cell  
152 wall components driving this classification (**Fig. S3**), namely arabinogalactan proteins (AGPs), xylans,  
153 low-DM HGs and RG-I (incl. arabinan and galactan side chains). For instance, we observed drastically  
154 lower levels of xylans in the succulents studied, compared to the non-succulent species (**Fig. S6**).  
155 However, xylans are often found in lignified support tissues (Zhong et al., 2013), and small-stature

156 succulent species such as the ones we studied generally lack these tissues, relying primarily on turgor for  
157 support (Niklas, 1992; Gibson, 1996; Bobich and North, 2009). Thus, such differences may not hold for  
158 larger succulents. An interesting observation concerns AGPs, a notoriously complex group of cell wall  
159 glycoproteins with many suggested functions, yet their precise mode of action is still uncertain (Seifert  
160 and Roberts, 2007; Ellis et al., 2010; Silva et al., 2020). Two mAbs targeting AGPs (LM14 and MAC207)  
161 did not yield any signal among succulents, despite being present in most non-succulent species tested  
162 (**Fig. S8**). Previous studies suggest that these two antibodies recognize the same or structurally related  
163 epitopes (Jackson et al., 2012; Marzec et al., 2015; Yan et al., 2015), which often exhibit a broad  
164 distribution across tissues (Amsbury et al., 2016; Wu et al., 2017; Leszczuk et al., 2019). Our results  
165 suggest that these epitopes are absent in some plant lineages, such as the Lamiids (*Coleus*, *Jasminum*,  
166 *Nicotiana*), in agreement with previous studies (Moller et al., 2008).

167         However, our results show that succulent representatives lack LM14 and MAC207 signals, even  
168 within lineages that are known to possess these epitopes. For example, succulent species from the  
169 Caryophyllales (*Anacampseros*, *Lithops* and *Portulacaria*) lacked these epitopes, whereas the non-  
170 succulent *Chenopodium quinoa* did not. Likewise, in the Asteraceae these epitopes were absent in the  
171 succulent species *Senecio crassissimus*, but present in the non-succulent *Leucanthemum maximum*. In  
172 contrast, other AGP-targeting mAbs showed comparable or slightly higher levels in succulents, likely  
173 reflecting the diversity of AGPs and their numerous alleged functions. Periplasmic AGPs for instance  
174 have been postulated as stabilizers of the membrane-cell wall continuum, and may also act as cell wall  
175 plasticizers when they are released from their membrane anchors (Gens et al., 2000; Knox, 2006; Lamport  
176 et al., 2006; Liu et al., 2015). The striking differences in signal intensity of the AGP-targeting mAbs we  
177 used warrant further exploration into the specific epitopes that they recognize and their functions.

178         The mobilization of soluble mannans has been suggested as a general drought response among  
179 succulents, based on studies of succulent leaves of *Aloe* and succulent-like storage organs of orchids and  
180 monocot geophytes (Ranwala and Miller, 2008; Wang et al., 2008; Chua et al., 2013; Ahl et al., 2019).  
181 However, our CoMPP data showed no clear difference between the mannans of succulents and non-  
182 succulents (**Fig. S7**). Instead, the few species with remarkably high signal for loosely bound, soluble  
183 mannans correspond to the three non-commelinid monocot species included in this study: *Aloe distans*  
184 (leaf succulent), *Dioscorea oppositifolia* and *Epipremnum aureum* (non-succulents). Among  
185 angiosperms, the presence of storage mannans in vegetative tissues seems to be restricted to monocots,  
186 with mannans being stored in granular or highly hydrated mucilaginous form within vacuolar cell  
187 compartments (Meier and Reid, 1982; He et al., 2017). Soluble mannans may therefore be uniquely



188 important to monocots, being repurposed for drought response in succulent monocots (e.g. Ahl et al.,  
189 2019; **Fig. 3**), and not a component of a more general succulent glycome.

190

## 191 **Conclusions and future directions**

192 Cell wall biomechanics and biochemistry of succulent leaves exhibit distinct differences from  
193 non-succulent species. In non-succulent species, highly rigid cell walls prevent elastic adjustment from  
194 having a physiologically meaningful impact on the  $TLP_{\Psi}$  (Bartlett et al., 2012). However, many succulent  
195 species have highly elastic cell walls, and our modelling indicates that even slight increases in cell wall  
196 elasticity (i.e. decreases in  $\epsilon$ ) in these species can have a large exponential effect on the  $TLP_{\Psi}$ . Therefore,  
197 succulent plants use elastic adjustment advantageously during dehydration to acclimate to declining  $\Psi$ . In  
198 addition to biomechanical differences, our glycomic data show several similarities across  
199 phylogenetically diverse succulent taxa, namely a higher degree of HG methyl-esterification and a greater  
200 abundance of RG-I. These biochemical differences likely contribute to the high elasticity in the cell walls  
201 of succulent organs, which in turn facilitates the folding process during dehydration (Fradera-Soler et al.,  
202 2022). Interestingly, some glycomic features seem to be restricted to certain succulent lineages, pointing  
203 to some glycomic diversity among succulent plants: succulent monocots may have co-opted soluble  
204 mannans for drought response, whereas succulents in the Caryophyllales contain pectin-rich apoplastic  
205 mucilage which boosts their water-storage capacity. Together, our data demonstrate that succulent plants  
206 occupy a unique phenotypic space regarding both cell wall biomechanics and biochemistry. We suggest  
207 that cell wall traits should be regarded as one of the core components of the adaptations that make up the  
208 succulent syndrome.

209 Looking forward, it will be valuable to explore cell wall biology among closely related succulent  
210 taxa and considering cell wall trait heterogeneity within succulent organs. Cell wall thickness and  
211 elasticity are known to differ between hydrenchyma and chlorenchyma in some succulent organs  
212 (Goldstein et al., 1991; Nobel, 2006; Leverett et al., 2022), but further examination of cell wall  
213 biomechanics and biochemistry is needed to fully understand how these traits aid in whole-plant survival  
214 during drought. Ultimately, further research is needed into the dynamic nature of cell walls in succulent  
215 plants and to determine whether cell wall traits are indeed regulated during drought. Besides high-  
216 throughput methods based on immune-profiling such as CoMPP, our understanding of cell wall  
217 composition, structure and assembly in succulents can also be advanced using visualization with  
218 fluorescent probes (Rydahl et al., 2018; Bidhendi et al., 2020), high-resolution microscopy techniques  
219 (Zhao et al., 2019; DeVree et al., 2021), and nuclear magnetic resonance (NMR) (Zhao et al., 2020).

220

## 221 **Acknowledgements**

222           The authors would like to thank Matthew Ogburn and Erika Edwards for the data that was used in  
223 the biomechanical modelling (see Ogburn and Edwards, 2012). The authors would also like to thank  
224 Theodor E. Bolsterli, Morten L. Stephensen, Ouda Khammy, Davide Visintainer and Luu Trinh (PLEN,  
225 University of Copenhagen) and the Kakteen-Haage nursery (Erfurt, Germany) for providing plant  
226 material, and Sylwia Głazowska and Jeanett Hansen (PLEN, University of Copenhagen) for help and  
227 support during laboratory work.

228           This research was partially funded by Newcastle University's R. B. Cook Scholarship.

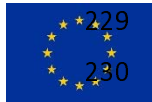

229           This project has received funding from the European Union's Horizon 2020 research and  
230 innovation programme under the Marie Skłodowska-Curie grant agreement No 801199.

231

232

## Tables

**Table 1.** Angiosperm species used in this study. Abbreviations for the source of plant material: Department of Plant and Environmental Sciences, University of Copenhagen (PLEN), Kakteen-Haage nursery (KH).

| <b>Plant species</b>            | <b>Abbreviation</b> | <b>Family</b>     | <b>Angiosperm clade</b> | <b>Succulent leaves?</b> | <b>Source of material</b> |
|---------------------------------|---------------------|-------------------|-------------------------|--------------------------|---------------------------|
| <i>Arabidopsis thaliana</i>     | A_tha               | Brassicaceae      | Eudicot                 | No                       | PLEN                      |
| <i>Chenopodium quinoa</i>       | C_qui               | Amaranthaceae     | Eudicot                 | No                       | PLEN                      |
| <i>Coleus scutellarioides</i>   | C_scu               | Lamiaceae         | Eudicot                 | No                       | PLEN                      |
| <i>Dioscorea oppositifolia</i>  | D_opp               | Dioscoreaceae     | Monocot                 | No                       | PLEN                      |
| <i>Epipremnum aureum</i>        | E_aur               | Araceae           | Monocot                 | No                       | PLEN                      |
| <i>Jasminum mesnyi</i>          | J_mes               | Oleaceae          | Eudicot                 | No                       | PLEN                      |
| <i>Leucanthemum maximum</i>     | L_max               | Asteraceae        | Eudicot                 | No                       | PLEN                      |
| <i>Nicotiana benthamiana</i>    | N_ben               | Solanaceae        | Eudicot                 | No                       | PLEN                      |
| <i>Viola hederacea</i>          | V_hed               | Violaceae         | Eudicot                 | No                       | PLEN                      |
| <i>Vitis vinifera</i>           | V_vin               | Vitaceae          | Eudicot                 | No                       | PLEN                      |
| <i>Aloe distans</i>             | A_dis               | Asphodelaceae     | Monocot                 | Yes                      | PLEN                      |
| <i>Anacampseros namaquensis</i> | A_nam               | Anacampserotaceae | Eudicot                 | Yes                      | KH                        |
| <i>Crassula ovata</i>           | C_ova               | Crassulaceae      | Eudicot                 | Yes                      | PLEN                      |
| <i>Hoya australis</i>           | H_aus               | Apocynaceae       | Eudicot                 | Yes                      | PLEN                      |
| <i>Kalanchoe millotii</i>       | K_mil               | Crassulaceae      | Eudicot                 | Yes                      | PLEN                      |
| <i>Lithops karasmontana</i>     | L_kar               | Aizoaceae         | Eudicot                 | Yes                      | KH                        |
| <i>Nematanthus gregarius</i>    | N_gre               | Gesneriaceae      | Eudicot                 | Yes                      | PLEN                      |
| <i>Peperomia asperula</i>       | P_asp               | Piperaceae        | Magnoliid               | Yes                      | KH                        |
| <i>Portulacaria afra</i>        | P_afr               | Didiereaceae      | Eudicot                 | Yes                      | PLEN                      |
| <i>Senecio crassissimus</i>     | S_cra               | Asteraceae        | Eudicot                 | Yes                      | PLEN                      |

## Figure captions

**Fig. 1: The unique role of cell wall biomechanics in succulent species.** Using data published by Ogburn and Edwards (2012), the  $TLP_{\Psi}$  was simulated according to **Eq. 2** by holding  $\pi_0$  constant for each species and varying  $\varepsilon$ . (A) In non-succulent species, such as *Calandrinia colchaguensis*, the true value of  $\varepsilon$  (dashed line) intersects at the flat portion of the curve. Hence, changes to  $\varepsilon$  have little to no effect on the  $TLP_{\Psi}$ . (B) In some succulent species, such as *Grahamia bracteata*, the true value of  $\varepsilon$  intersects at the curved portion of the line, meaning changes to  $\varepsilon$  effects the  $TLP_{\Psi}$ . A quantitative estimate of the extent to which changing  $\varepsilon$  effects the  $TLP_{\Psi}$  was generated by finding the derivative of the curve at the point where the dashed line intersects [ $f'(\varepsilon)$ ]. (C) In the Caryophyllales, lower values of  $\varepsilon$  result in exponentially higher values of  $f'(\varepsilon)$ . An exponential curve still fit these data well when the species with the highest  $f'(\varepsilon)$  value was removed (data not shown). (D) Saturated water content (SWC) correlates with the  $f'(\varepsilon)$ , after this value has been log transformed.

**Fig. 2: The succulent glycome: extracellular glycomic differences between succulents and non-succulents.** (A) 3D score plot of the first three MFA dimensions (17%, 12.1% and 10.8% of total variance respectively) of glycomic data from 10 leaf succulents and 10 non-succulents (see **Table 1** for abbreviations), with concentration ellipsoids for each group. Succulents and non-succulents occupy distinct phenotypic spaces, particularly along dimension 3. On the left, boxplot of succulence index (SI) values for all the species; the two groups differ significantly. (B–E) Selection of antibodies showing significant differences between succulents and non-succulents for (B–D) pectins and (E) glycoproteins. Significant differences between the two groups, assessed using either Welch's *t*-test (if both are normally distributed) or Wilcoxon test, are indicated by asterisks.

**Fig. 3: Glycomic diversity among succulent plants.** (A) Succulent tissues have thin and highly elastic cell walls and, as shown in this study, elastic adjustment through cell wall remodelling likely plays a crucial role in preventing turgor loss during dehydration. Despite the clear differences between succulents and non-succulents, we also noted considerable glycomic diversity among succulents. (B) Mucilage-producing succulent lineages, mostly those in the Caryophyllales and particularly in the Portulacineae, accumulate pectin-rich mucilage in the periplasmic space of mucilage cells and/or in intercellular spaces, which boosts their water-storage capacity (Mauseth, 2005; Ogburn and Edwards, 2009). (C) Storage mannans can be found in vegetative tissues of many monocot lineages, often stored within vacuolar compartments. In succulent monocots, mobilization of these mannans may be part of the drought response, as seen in *Aloe* (Ahl et al., 2019), in which cell wall-associated mannan is remobilized into the

protoplasm. However, the dynamics between cell-wall associated and vacuolar mannans in monocots remain largely unexplored. Created with BioRender.com.

## References

- Ahl, L. I., Grace, O. M., Pedersen, H. L., Willats, W. G. T., Jørgensen, B., and Rønsted, N. (2018). Analyses of *Aloe* Polysaccharides Using Carbohydrate Microarray Profiling. *Journal of AOAC INTERNATIONAL* 101, 1720–1728. doi:10.5740/jaoacint.18-0120.
- Ahl, L. I., Mravec, J., Jørgensen, B., Rudall, P. J., Rønsted, N., and Grace, O. M. (2019). Dynamics of intracellular mannan and cell wall folding in the drought responses of succulent *Aloe* species. *Plant, Cell & Environment* 42, 2458–2471. doi:10.1111/pce.13560.
- Amsbury, S., Hunt, L., Elhaddad, N., Baillie, A., Lundgren, M., Verhertbruggen, Y., ... & Gray, J. E. (2016). Stomatal function requires pectin de-methyl-esterification of the guard cell wall. *Current Biology*, 26(21), 2899-2906.
- Arakaki, M., Christin, P.-A., Nyffeler, R., Lendel, A., Eggli, U., Ogburn, R. M., et al. (2011). Contemporaneous and recent radiations of the world's major succulent plant lineages. *PNAS* 108, 8379–8384. doi:10.1073/pnas.1100628108.
- Bartlett, M. K., Scoffoni, C., and Sack, L. (2012). The determinants of leaf turgor loss point and prediction of drought tolerance of species and biomes: a global meta-analysis. *Ecology Letters* 15, 393–405. doi:10.1111/j.1461-0248.2012.01751.x.
- Beadle, C. L., Ludlow, M. M., and Honeysett, J. L. (1993). “Water relations,” in *Photosynthesis and Production in a Changing Environment: A field and laboratory manual*, eds. D. O. Hall, J. M. O. Scurlock, H. R. Bolhår-Nordenkampf, R. C. Leegood, and S. P. Long (Dordrecht: Springer Netherlands), 113–128. doi:10.1007/978-94-011-1566-7\_8.
- Bidhendi, A. J., and Geitmann, A. (2016). Relating the mechanics of the primary plant cell wall to morphogenesis. *Journal of Experimental Botany* 67, 449–461. doi:10.1093/jxb/erv535.
- Bidhendi, A. J., Chebli, Y., and Geitmann, A. (2020). Fluorescence visualization of cellulose and pectin in the primary plant cell wall. *Journal of Microscopy* 278, 164–181. doi:10.1111/jmi.12895.
- Bobich, E. G., and North, G. B. (2009). “Structural implications of succulence: Architecture, anatomy, and mechanics of photosynthetic stem succulents, pachycauls, and leaf succulents,” in *Perspectives in Biophysical Plant Ecophysiology: A Tribute to Park S. Nobel*, eds. E. de la Barrera and W. K. Smith (México: UNAM), 3–37.
- Borland, A. M., Griffiths, H., Hartwell, J., and Smith, J. A. C. (2009). Exploiting the potential of plants with crassulacean acid metabolism for bioenergy production on marginal lands. *Journal of Experimental Botany* 60, 2879–2896. doi:10.1093/jxb/erp118.
- Borland, A. M., Leverett, A., Hurtado-Castano, N., Hu, R., and Yang, X. (2018). “Functional Anatomical Traits of the Photosynthetic Organs of Plants with Crassulacean Acid Metabolism,” in *The Leaf: A Platform for Performing Photosynthesis Advances in Photosynthesis and Respiration.*, eds. W. W. Adams III and I. Terashima (Cham: Springer International Publishing), 281–305. doi:10.1007/978-3-319-93594-2\_10.
- Brodribb, T. J., Skelton, R. P., McAdam, S. A. M., Bienaimé, D., Lucani, C. J., and Marmottant, P. (2016). Visual quantification of embolism reveals leaf vulnerability to hydraulic failure. *New Phytologist* 209, 1403–1409. doi:10.1111/nph.13846.

- Carpita, N. C., Ralph, J., and McCann, M. C. (2015). "The Cell Wall," in *Biochemistry and Molecular Biology of Plants* (John Wiley & Sons).
- Choat, B., Brodribb, T. J., Brodersen, C. R., Duursma, R. A., López, R., and Medlyn, B. E. (2018). Triggers of tree mortality under drought. *Nature* 558, 531–539. doi:10.1038/s41586-018-0240-x.
- Chua, M., Hocking, T. J., Chan, K., and Baldwin, T. C. (2013). Temporal and spatial regulation of glucomannan deposition and mobilization in corms of *Amorphophallus konjac* (Araceae). *American Journal of Botany* 100, 337–345. doi:10.3732/ajb.1200547.
- Cole, T. C. H. (2020). Caryophyllales Phylogeny Poster. Available at: <http://dx.doi.org/10.13140/RG.2.2.23572.58248>.
- Cornuault V, Buffetto F, Marcus SE, Crépeau M-J, Guillon F, Ralet M-C, Knox P (2017) LM6-M: a high avidity rat monoclonal antibody to pectic  $\alpha$ -1,5-L-arabinan. *BioRxiv* <https://doi.org/10.1101/161604>
- Davis, S. C., Kuzmick, E. R., Niechayev, N., and Hunsaker, D. J. (2017). Productivity and water use efficiency of *Agave americana* in the first field trial as bioenergy feedstock on arid lands. *GCB Bioenergy* 9, 314–325. doi:10.1111/gcbb.12324.
- DeVree, B. T., Steiner, L. M., Głazowska, S., Ruhnnow, F., Herburger, K., Persson, S., & Mravec, J. (2021). Current and future advances in fluorescence-based visualization of plant cell wall components and cell wall biosynthetic machineries. *Biotechnology for Biofuels* 14(1), 1-26.
- Eggle, U., and Nyffeler, R. (2009). Living under temporarily arid conditions - succulence as an adaptive strategy. *brad* 2009, 13–36. doi:10.25223/brad.n27.2009.a10.
- Ellis, M., Egelund, J., Schultz, C. J., and Bacic, A. (2010). Arabinogalactan-Proteins: Key Regulators at the Cell Surface? *Plant Physiology* 153, 403–419. doi:10.1104/pp.110.156000.
- Feng T, Nyffenegger C, Højrup P, Vidal-Melgosa S, Yan KP, Fangel JU, Meyer AS, Kirpekar F, Willats WG, Mikkelsen JD. 2014. Characterization of an extensin-modifying metalloprotease: N-terminal processing and substrate cleavage pattern of *Pectobacterium carotovorum* Prt1. *Applied Microbiology and Biotechnology* 98, 10077–10089.
- Fradera-Soler, M., Grace, O. M., Jørgensen, B., and Mravec, J. (2022). Elastic and collapsible: current understanding of cell walls in succulent plants. *Journal of Experimental Botany* 73(8), 2290–2307.
- Fradera-Soler, M., Rudall, P. J., Prychid, C. J., and Grace, O. M. (2021). Evolutionary success in arid habitats: Morpho-anatomy of succulent leaves of *Crassula* species from southern Africa. *Journal of Arid Environments* 185, 104319. doi:10.1016/j.jaridenv.2020.104319.
- Gens, J. S., Fujiki, M., and Pickard, B. G. (2000). Arabinogalactan protein and wall-associated kinase in a plasmalemmal reticulum with specialized vertices. *Protoplasma* 212, 115–134. doi:10.1007/BF01279353.
- Gibson, A. C. (1996). *Structure-Function Relations of Warm Desert Plants*. Berlin, Heidelberg: Springer-Verlag.

- Ginestra, G., Parker, M. L., Bennett, R. N., Robertson, J., Mandalari, G., Narbad, A., et al. (2009). Anatomical, Chemical, and Biochemical Characterization of Cladodes from Prickly Pear [*Opuntia ficus-indica* (L.) Mill.]. *J. Agric. Food Chem.* 57, 10323–10330. doi:10.1021/jf9022096.
- Goldstein, G., Andrade, J. L., and Nobel, P. S. (1991). Differences in Water Relations Parameters for the Chlorenchyma and the Parenchyma of *Opuntia ficus-indica* Under Wet Versus Dry Conditions. *Functional Plant Biol.* 18, 95–107. doi:10.1071/pp9910095.
- Grace, O. M. (2019). Succulent plant diversity as natural capital. *PLANTS, PEOPLE, PLANET* 1, 336–345. doi:10.1002/ppp3.25.
- Griffiths, H., Males, J. (2017). Succulent plants. *Current Biology*, 27(17), R890-R896.
- Harholt, J., Suttangkakul, A., and Vibe Scheller, H. (2010). Biosynthesis of Pectin. *Plant Physiology* 153, 384–395. doi:10.1104/pp.110.156588.
- Hartzell, S., Bartlett, M. S., Inglese, P., Consoli, S., Yin, J., and Porporato, A. (2021). Modelling nonlinear dynamics of Crassulacean acid metabolism productivity and water use for global predictions. *Plant, Cell & Environment* 44, 34–48. doi:10.1111/pce.13918.
- He, C., Wu, K., Zhang, J., Liu, X., Zeng, S., Yu, Z., ... & Duan, J. (2017). Cytochemical localization of polysaccharides in *Dendrobium officinale* and the involvement of DoCSLA6 in the synthesis of mannan polysaccharides. *Frontiers in plant science*, 8, 173.
- Henry, C., John, G. P., Pan, R., Bartlett, M. K., Fletcher, L. R., Scoffoni, C., et al. (2019). A stomatal safety-efficiency trade-off constrains responses to leaf dehydration. *Nat Commun* 10, 3398. doi:10.1038/s41467-019-11006-1.
- Hernandes-Lopes, J., Oliveira-Neto, M. A., and Melo-de-Pinna, G. F. A. (2016). Different Ways to Build Succulent Leaves in Portulacineae (Caryophyllales). *International Journal of Plant Sciences* 177, 198–208. doi:10.1086/684178.
- Heyduk, K. (2021). The genetic control of succulent leaf development. *Current Opinion in Plant Biology* 59, 101978. doi:10.1016/j.pbi.2020.11.003.
- Heyduk, K., McKain, M. R., Lalani, F., and Leebens-Mack, J. (2016). Evolution of a CAM anatomy predates the origins of Crassulacean acid metabolism in the Agavoideae (Asparagaceae). *Molecular Phylogenetics and Evolution* 105, 102–113. doi:10.1016/j.ympev.2016.08.018.
- Hocq, L., Pelloux, J., and Lefebvre, V. (2017). Connecting Homogalacturonan-Type Pectin Remodeling to Acid Growth. *Trends in Plant Science* 22, 20–29. doi:10.1016/j.tplants.2016.10.009.
- Jackson, O., Taylor, O., Adams, D. G., & Knox, J. P. (2012). Arabinogalactan proteins occur in the free-living cyanobacterium genus *Nostoc* and in plant–*Nostoc* symbioses. *Molecular Plant-Microbe Interactions*, 25(10), 1338-1349.
- Jiao, W., Wang, L., Smith, W. K., Chang, Q., Wang, H., and D’Odorico, P. (2021). Observed increasing water constraint on vegetation growth over the last three decades. *Nat Commun* 12, 3777. doi:10.1038/s41467-021-24016-9.



- Jones, A. M., Zhou, Y., Held, M. A., and Davis, S. C. (2020). Tissue Composition of *Agave americana* L. Yields Greater Carbohydrates From Enzymatic Hydrolysis Than Advanced Bioenergy Crops. *Frontiers in Plant Science* 11. Available at: <https://www.frontiersin.org/article/10.3389/fpls.2020.00654> [Accessed February 4, 2022].
- Kaczmarek, A., Pieczywek, P. M., Cybulska, J., and Zdunek, A. (2022). Structure and functionality of Rhamnogalacturonan I in the cell wall and in solution: A review. *Carbohydrate Polymers* 278, 118909. doi:10.1016/j.carbpol.2021.118909.
- Knox, J. P. (2006). Up against the wall: arabinogalactan-protein dynamics at cell surfaces. *New Phytologist* 169, 443–445. doi:10.1111/j.1469-8137.2006.01640.x.
- Koutaniemi S., Guillon F., Tranquet O., Bouchet B., Tuomainen P., Virkki L., et al. (2012) Substituent-specific antibody against glucuronoxylan reveals close association of glucuronic acid and acetyl substituents and distinct labeling patterns in tree species. *Planta* 236: 739–751.
- Kunert, N., Zailaa, J., Herrmann, V., Muller-Landau, H. C., Wright, S. J., Pérez, R., et al. (2021). Leaf turgor loss point shapes local and regional distributions of evergreen but not deciduous tropical trees. *New Phytologist* 230, 485–496. doi:10.1111/nph.17187.
- Lampert, D. T. A., Kieliszewski, M. J., and Showalter, A. M. (2006). Salt stress upregulates periplasmic arabinogalactan proteins: using salt stress to analyse AGP function\*. *New Phytologist* 169, 479–492. doi:10.1111/j.1469-8137.2005.01591.x.
- Leszczuk, A., Wydrych, J., & Szczuka, E. (2019). The occurrence of calcium oxalate crystals and distribution of arabinogalactan proteins (AGPs) in ovary cells during *Fragaria x ananassa* (Duch.) development. *Journal of Plant Growth Regulation*, 38(3), 1028-1036.
- Leverett, A., Castaño, N. H., Ferguson, K., Winter, K., Borland, A. M. (2021). Crassulacean acid metabolism (CAM) supersedes the turgor loss point (TLP) as an important adaptation across a precipitation gradient, in the genus *Clusia*. *Functional Plant Biol.* 48, 703–716. doi:10.1071/FP20268.
- Leverett, A., Hartzell, S., Winter, K., Garcia, M., Aranda, J., Virgo, A., Smith, A. J., Focht, P., Rasmussen-Arda, A., Willats, W. G. T., Cowan-Turner, D., Borland, A. M., (2022). Dissecting succulence: crassulacean acid metabolism and hydraulic capacitance are independent adaptations in *Clusia* leaves. *BioRxiv*. doi:10.1101/2022.03.30.486278
- Levesque-Tremblay, G., Pelloux, J., Braybrook, S. A., and Müller, K. (2015). Tuning of pectin methylesterification: consequences for cell wall biomechanics and development. *Planta* 242, 791–811. doi:10.1007/s00425-015-2358-5.
- Li, H., Pattathil, S., Foston, M. B., Ding, S.-Y., Kumar, R., Gao, X., et al. (2014). *Agave* proves to be a low recalcitrant lignocellulosic feedstock for biofuels production on semi-arid lands. *Biotechnology for Biofuels* 7, 50. doi:10.1186/1754-6834-7-50.
- Lim, S. D., Mayer, J. A., Yim, W. C., and Cushman, J. C. (2020). Plant tissue succulence engineering improves water-use efficiency, water-deficit stress attenuation and salinity tolerance in *Arabidopsis*. *The Plant Journal* 103, 1049–1072. doi:10.1111/tpj.14783.

- Lim, S. D., Yim, W. C., Liu, D., Hu, R., Yang, X., and Cushman, J. C. (2018). A *Vitis vinifera* basic helix–loop–helix transcription factor enhances plant cell size, vegetative biomass and reproductive yield. *Plant Biotechnology Journal* 16, 1595–1615. doi:10.1111/pbi.12898.
- Liu, Z., Persson, S., and Sánchez-Rodríguez, C. (2015). At the border: the plasma membrane–cell wall continuum. *Journal of Experimental Botany* 66, 1553–1563. doi:10.1093/jxb/erv019.
- Males, J. (2017). Secrets of succulence. *Journal of Experimental Botany* 68, 2121–2134. doi:10.1093/jxb/erx096.
- Marzec, M., Szarejko, I., & Melzer, M. (2015). Arabinogalactan proteins are involved in root hair development in barley. *Journal of Experimental Botany*, 66(5), 1245-1257.
- Mauseth, J. D. (2005). Anatomical features, other than wood, in subfamily Opuntioideae (Cactaceae). *Haseltonia*, 2005(11), 113-125.
- Meier H, Reid JSG. 1982. Reserve polysaccharides other than starch in higher plants. In: Loewus FA, Tanner W, eds. *Plant carbohydrates I*. Berlin, Heidelberg: Springer, 418–471.
- Moller, I., Sørensen, I., Bernal, A. J., Blaukopf, C., Lee, K., Øbro, J., et al. (2007). High-throughput mapping of cell-wall polymers within and between plants using novel microarrays. *The Plant Journal* 50, 1118–1128. doi:10.1111/j.1365-313X.2007.03114.x.
- Moller, I., Marcus, S. E., Haeger, A., Verherbruggen, Y., Verhoef, R., Schols, H., ... & Willats, W. (2008). High-throughput screening of monoclonal antibodies against plant cell wall glycans by hierarchical clustering of their carbohydrate microarray binding profiles. *Glycoconjugate journal*, 25(1), 37-48.
- Moore, J. P., Nguema-Ona, E. E., Vicré-Gibouin, M., Sørensen, I., Willats, W. G. T., Driouich, A., et al. (2013). Arabinose-rich polymers as an evolutionary strategy to plasticize resurrection plant cell walls against desiccation. *Planta* 237, 739–754. doi:10.1007/s00425-012-1785-9.
- Neupane, D., Mayer, J. A., Niechayev, N. A., Bishop, C. D., and Cushman, J. C. (2021). Five-year field trial of the biomass productivity and water input response of cactus pear (*Opuntia* spp.) as a bioenergy feedstock for arid lands. *GCB Bioenergy* 13, 719–741. doi:10.1111/gcbb.12805.
- Niklas, K. J. (1992). *Plant Biomechanics: An Engineering Approach to Plant Form and Function*. Chicago: University of Chicago Press.
- Nobel, P. S. (2006). Parenchyma–Chlorenchyma Water Movement during Drought for the Hemiepiphytic Cactus *Hylocereus undatus*. *Annals of Botany* 97, 469–474. doi:10.1093/aob/mcj054.
- Ogburn, R. M., & Edwards, E. J. (2009). Anatomical variation in Cactaceae and relatives: trait lability and evolutionary innovation. *American Journal of Botany*, 96(2), 391-408.
- Ogburn, R. M., and Edwards, E. J. (2010). “The Ecological Water-Use Strategies of Succulent Plants,” in *Advances in Botanical Research*, eds. J.-C. Kader and M. Delseny (Burlington, MA: Academic Press), 179–225. doi:10.1016/B978-0-12-380868-4.00004-1.

- Ogburn, R. M., and Edwards, E. J. (2012). Quantifying succulence: a rapid, physiologically meaningful metric of plant water storage. *Plant, Cell & Environment* 35, 1533–1542. doi:10.1111/j.1365-3040.2012.02503.x.
- Owen, N. A., and Griffiths, H. (2014). Marginal land bioethanol yield potential of four crassulacean acid metabolism candidates (*Agave fourcroydes*, *Agave salmiana*, *Agave tequilana* and *Opuntia ficus-indica*) in Australia. *GCB Bioenergy* 6, 687–703. doi:10.1111/gcbb.12094.
- Pattathil S, Avci U, Baldwin D, Swennes AG, McGill JA, Popper Z, Bootten T, Albert A, Davis RH, Chennareddy C, Dong R, O'Shea B, Rossi R, Leoff C, Freshour G, Narra R, O'Neil M, York WS, Hahn MG. (2010) A Comprehensive Toolkit of Plant Cell Wall Glycan-Directed Monoclonal Antibodies. *Plant Physiol.* 153:514-525.
- Peaucelle, A., Braybrook, S. A., Le Guillou, L., Bron, E., Kuhlemeier, C., and Höfte, H. (2011). Pectin-Induced Changes in Cell Wall Mechanics Underlie Organ Initiation in *Arabidopsis*. *Current Biology* 21, 1720–1726. doi:10.1016/j.cub.2011.08.057.
- Pennell RI, Janniche L, Kjellbom P, Scofield GN, Peart JM, Roberts K (1991) Developmental regulation of a plasma membrane arabinogalactan protein epitope in oilseed rape flowers. *Plant Cell* 3:1317-1326.
- Popper, Z. A., Michel, G., Hervé, C., Domozych, D. S., Willats, W. G. T., Tuohy, M. G., et al. (2011). Evolution and Diversity of Plant Cell Walls: From Algae to Flowering Plants. *Annual Review of Plant Biology* 62, 567–590. doi:10.1146/annurev-arplant-042110-103809.
- Ranwala, A. P., and Miller, W. B. (2008). Analysis of nonstructural carbohydrates in storage organs of 30 ornamental geophytes by high-performance anion-exchange chromatography with pulsed amperometric detection. *New Phytologist* 180, 421–433. doi:10.1111/j.1469-8137.2008.02585.x.
- Rydahl, M. G., Hansen, A. R., Kračun, S. K., and Mravec, J. (2018). Report on the Current Inventory of the Toolbox for Plant Cell Wall Analysis: Proteinaceous and Small Molecular Probes. *Frontiers in Plant Science* 9, 581. doi:10.3389/fpls.2018.00581.
- Seifert, G. J., and Roberts, K. (2007). The Biology of Arabinogalactan Proteins. *Annual Review of Plant Biology* 58, 137–161. doi:10.1146/annurev.arplant.58.032806.103801.
- Sheffield, J., and Wood, E. F. (2008). Global Trends and Variability in Soil Moisture and Drought Characteristics, 1950–2000, from Observation-Driven Simulations of the Terrestrial Hydrologic Cycle. *Journal of Climate* 21, 432–458. doi:10.1175/2007JCLI1822.1.
- Silva, J., Ferraz, R., Dupree, P., Showalter, A. M., and Coimbra, S. (2020). Three Decades of Advances in Arabinogalactan-Protein Biosynthesis. *Frontiers in Plant Science* 11. Available at: <https://www.frontiersin.org/article/10.3389/fpls.2020.610377> [Accessed February 17, 2022].
- Trueba, S., Pan, R., Scoffoni, C., John, G. P., Davis, S. D., and Sack, L. (2019). Thresholds for leaf damage due to dehydration: declines of hydraulic function, stomatal conductance and cellular integrity precede those for photochemistry. *New Phytologist* 223, 134–149. doi:10.1111/nph.15779.

- Vollenweider, P., Menard, T., Arend, M., Kuster, T. M., and Günthardt-Goerg, M. S. (2016). Structural changes associated with drought stress symptoms in foliage of Central European oaks. *Trees* 30, 883–900. doi:10.1007/s00468-015-1329-6.
- Wang, C.-Y., Chiou, C.-Y., Wang, H.-L., Krishnamurthy, R., Venkatagiri, S., Tan, J., et al. (2008). Carbohydrate mobilization and gene regulatory profile in the pseudobulb of *Oncidium* orchid during the flowering process. *Planta* 227, 1063–1077. doi:10.1007/s00425-007-0681-1.
- Wilkinson MD, Tosi P, Lovegrove A, Corol DI, Ward JL, Palmer R, et al. The *Gsp-1* genes encode the wheat arabinogalactan peptide. *J Cereal Sci.* (2017) 74:155–64. doi: 10.1016/j.jcs.2017.02.006
- Willats, W. G. T., McCartney, L., Mackie, W., and Knox, J. P. (2001). Pectin: cell biology and prospects for functional analysis. *Plant Mol Biol* 47, 9–27. doi:10.1023/A:1010662911148.
- Wormit, A., and Usadel, B. (2018). The Multifaceted Role of Pectin Methylesterase Inhibitors (PMEIs). *International Journal of Molecular Sciences* 19, 2878. doi:10.3390/ijms19102878.
- Wu, Y., Fan, W., Li, X., Chen, H., Takáč, T., Šamajová, O., ... & Xu, C. (2017). Expression and distribution of extensins and AGPs in susceptible and resistant banana cultivars in response to wounding and *Fusarium oxysporum*. *Scientific reports*, 7(1), 1-13.
- Yan, Y., Takáč, T., Li, X., Chen, H., Wang, Y., Xu, E., ... & Xu, C. (2015). Variable content and distribution of arabinogalactan proteins in banana (*Musa* spp.) under low temperature stress. *Frontiers in plant science*, 6, 353.
- Zhang, Y.-J., Rockwell, F. E., Graham, A. C., Alexander, T., and Holbrook, N. M. (2016). Reversible Leaf Xylem Collapse: A Potential “Circuit Breaker” against Cavitation. *Plant Physiology* 172, 2261–2274. doi:10.1104/pp.16.01191.
- Zhao, W., Fernando, L. D., Kirui, A., Deligey, F., and Wang, T. (2020). Solid-state NMR of plant and fungal cell walls: A critical review. *Solid State Nuclear Magnetic Resonance* 107, 101660. doi:10.1016/j.ssnmr.2020.101660.
- Zhao, Y., Man, Y., Wen, J., Guo, Y., and Lin, J. (2019). Advances in Imaging Plant Cell Walls. *Trends in Plant Science* 24, 867–878. doi:10.1016/j.tplants.2019.05.009.
- Zhong, R., McCarthy, R. L., Haghghat, M., and Ye, Z.-H. (2013). The Poplar MYB Master Switches Bind to the SMRE Site and Activate the Secondary Wall Biosynthetic Program during Wood Formation. *PLOS ONE* 8, e69219. doi:10.1371/journal.pone.0069219.

# Figure 1

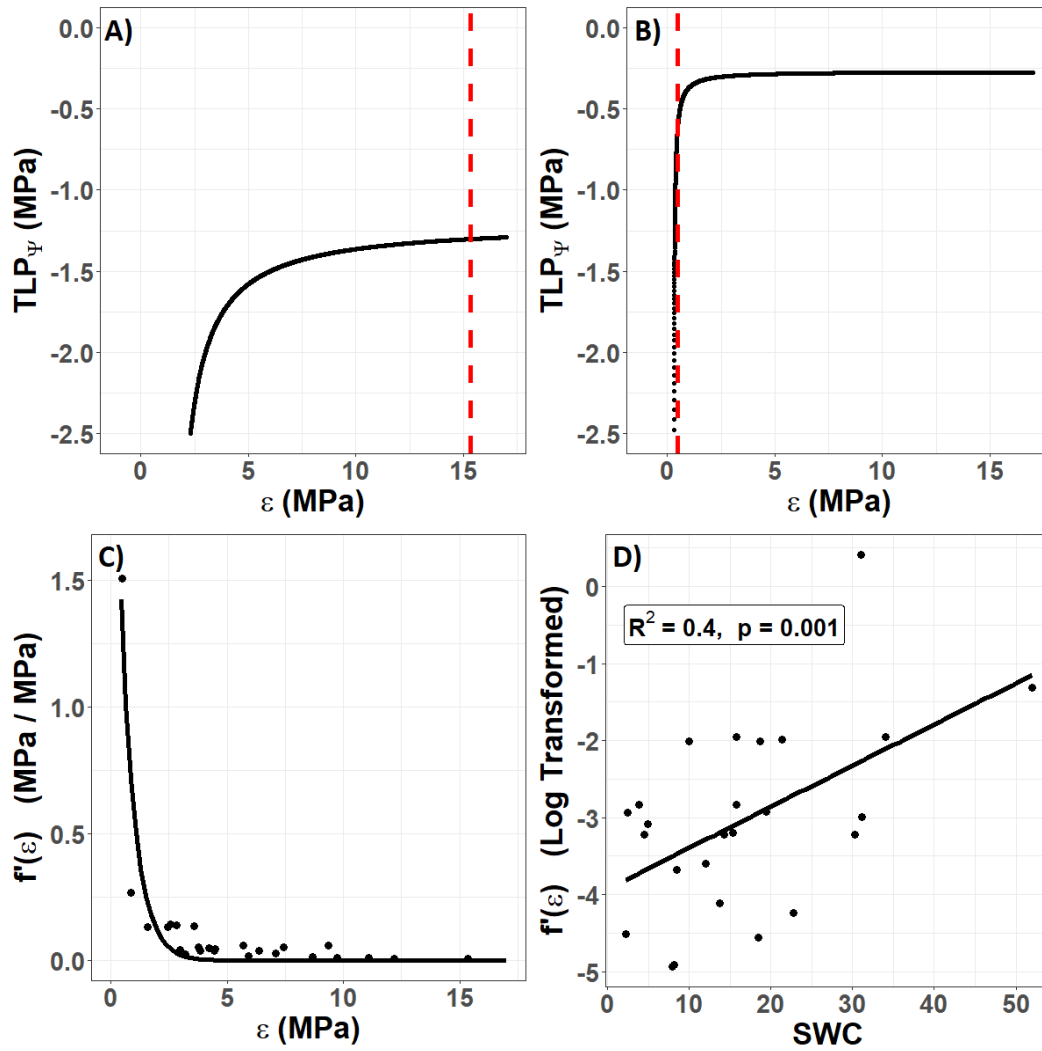

## Figure 2

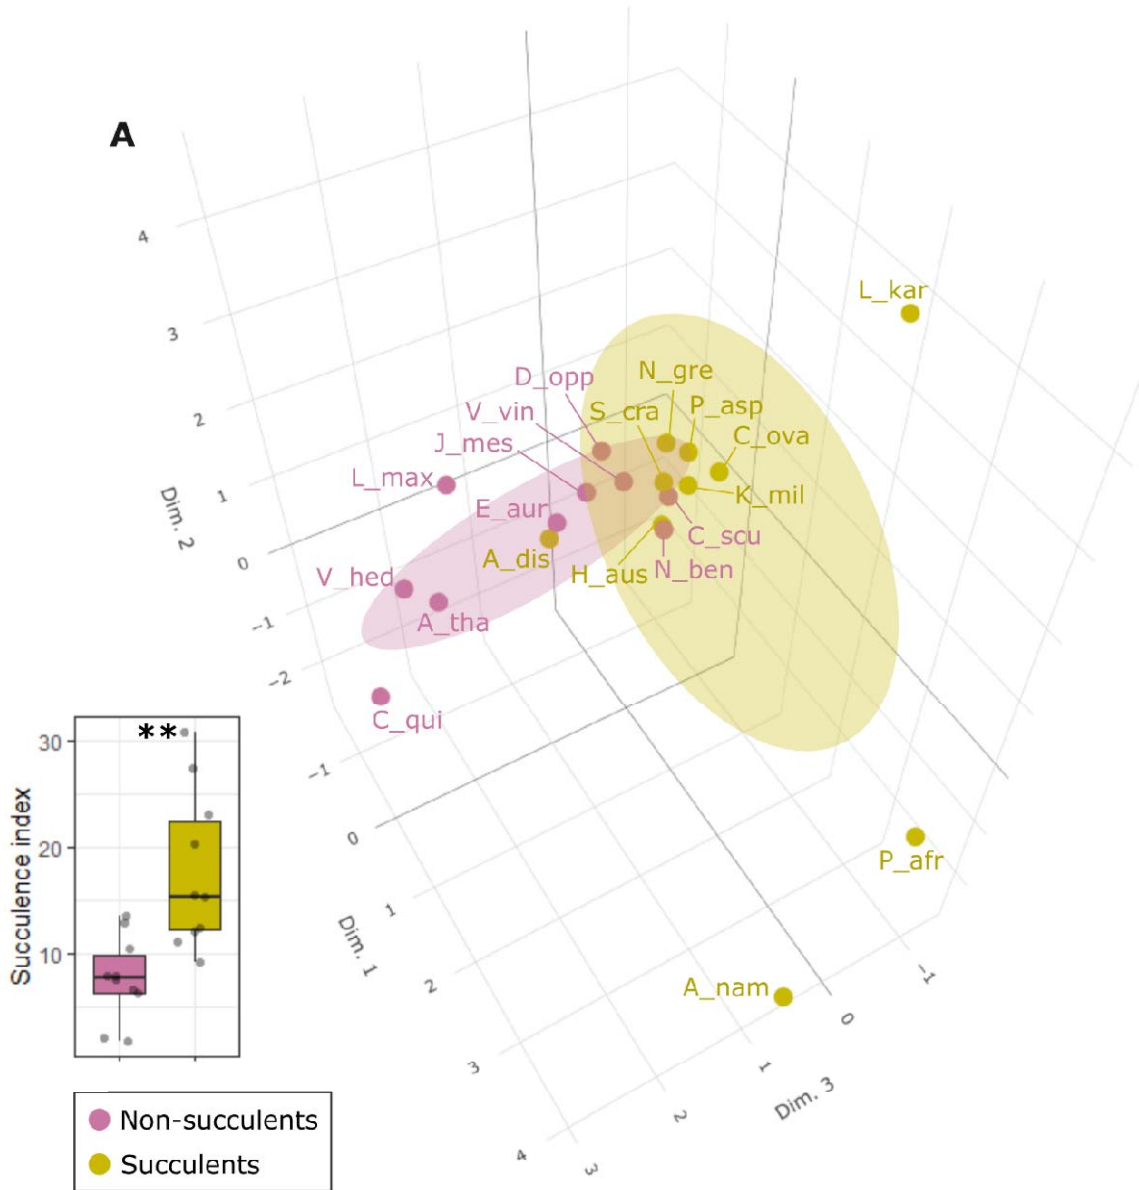

**B** Low-DM HGs  
LM19 (water)

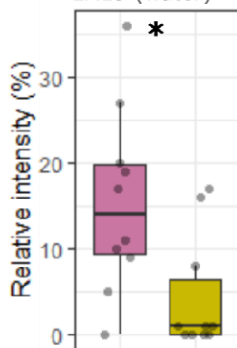

**C** High-DM HGs  
LM20 (CDTA)

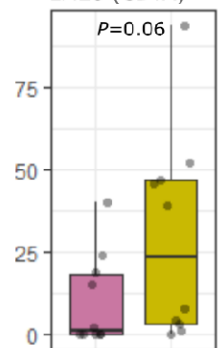

**D** RG-I  
INRA-RU1 (CDTA)

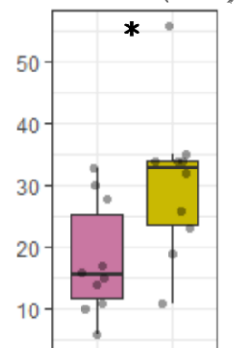

**E** AGPs  
LM14 (NaOH)

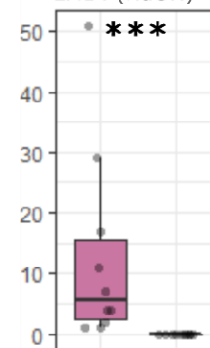

# Figure 3

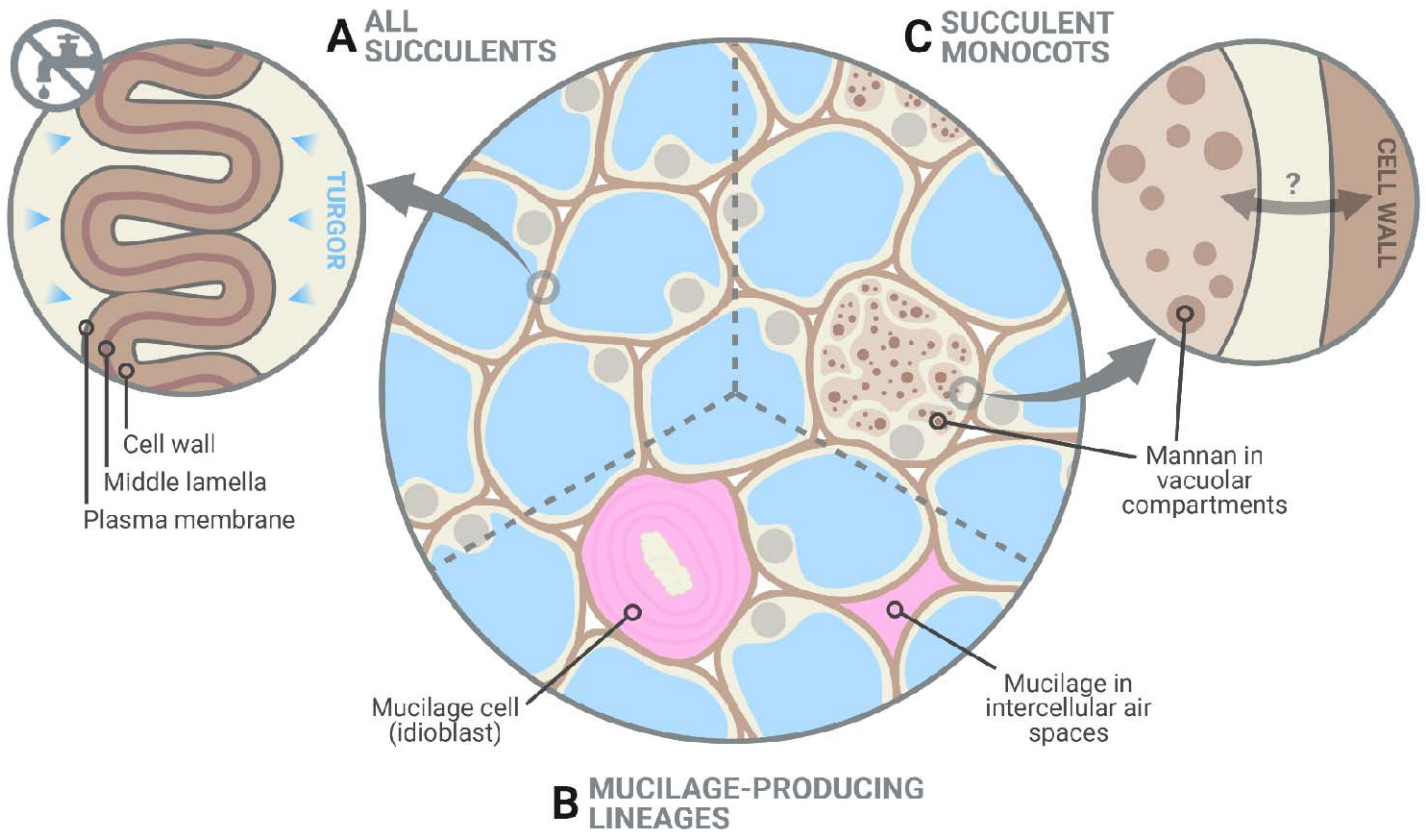

Source: http://biorxiv.org/content/10.1101/2022.06.25.497541v1.full.pdf
